# Supplementary material for: Analysis of CEPH-accredited DrPH programs in the United States: A mixed-methods study
Source: PLOS journal article supplement (doi:10.1371/journal.pone.0245892), 2021-02-04
Supplement: S8 (10.1371/journal.pone.0245892.s008) [file journal.pone.0245892.s008]

**S8 Table. Internal funding information**

| School Name                                                              | Internal Funding                                                                                                                                                                                                                                                                                                                                                 | Internal Funding resource website or handbook                                                                                                                                                                                                                                                                                                    |
|--------------------------------------------------------------------------|------------------------------------------------------------------------------------------------------------------------------------------------------------------------------------------------------------------------------------------------------------------------------------------------------------------------------------------------------------------|--------------------------------------------------------------------------------------------------------------------------------------------------------------------------------------------------------------------------------------------------------------------------------------------------------------------------------------------------|
| 1. Boston University School of Public Health                             | <ul style="list-style-type: none"> <li>For incoming DrPH students: school offers tuition scholarships.</li> <li>For current DrPH students: various doctoral training grants, including the HRSA/MCHB-funded MCH Applied Research Fellowship Program, are available.</li> <li>For part-time DrPH students: the tuition remission program is available.</li> </ul> | <a href="https://www.bu.edu/sph/admissions/financing-your-education/">https://www.bu.edu/sph/admissions/financing-your-education/</a>                                                                                                                                                                                                            |
| 2. Claremont Graduate University School of Community & Global Health     | There are three fellowships provided to DrPH students: Departmental Fellowships, Blaisdell Fellowships, and Trustee Fellowship Awards.                                                                                                                                                                                                                           | <a href="https://www.cgu.edu/academics/program/doctor-public-health/cost-aid/">https://www.cgu.edu/academics/program/doctor-public-health/cost-aid/</a>                                                                                                                                                                                          |
| 3. University of Colorado School of Public Health                        | School provides Public Health Scholarships and Global Health Scholarships to graduate students.                                                                                                                                                                                                                                                                  | <a href="http://www.ucdenver.edu/academics/colleges/PublicHealth/research/centers/globalhealth/education/Pages/scholarships.aspx">http://www.ucdenver.edu/academics/colleges/PublicHealth/research/centers/globalhealth/education/Pages/scholarships.aspx</a>                                                                                    |
| 4. Columbia University Mailman School of Public Health                   | School provides scholarships, fellowships, and grants as well as five-year funding packages.                                                                                                                                                                                                                                                                     | <a href="https://www.mailman.columbia.edu/become-student/how-apply/financial-aid/funding-options/scholarships-fellowships-and-grants">https://www.mailman.columbia.edu/become-student/how-apply/financial-aid/funding-options/scholarships-fellowships-and-grants</a>                                                                            |
| 5. Drexel University Dornsife School of Public Health                    | School provides scholarships, financial aid, teaching and/or research assistantships, and fellowships.                                                                                                                                                                                                                                                           | <ul style="list-style-type: none"> <li><a href="https://drexel.edu/dornsife/admissions/apply/faqs">https://drexel.edu/dornsife/admissions/apply/faqs</a></li> <li><a href="https://drexel.edu/dornsife/admissions/scholarships-tuition-financial-aid/">https://drexel.edu/dornsife/admissions/scholarships-tuition-financial-aid/</a></li> </ul> |
| 6. East Tennessee State University College of Public Health              | School provides a Graduate Assistantship and Tuition Scholarship.                                                                                                                                                                                                                                                                                                | <a href="https://www.etsu.edu/cph/documents/drphhandbook.pdf">https://www.etsu.edu/cph/documents/drphhandbook.pdf</a>                                                                                                                                                                                                                            |
| 7. George Washington University Milken Institute School of Public Health | <ul style="list-style-type: none"> <li>School provides Graduate Assistantship funding to DrPH students.</li> <li>There are funding, scholarship opportunities</li> </ul>                                                                                                                                                                                         | <ul style="list-style-type: none"> <li><a href="https://publichealth.gwu.edu/content/funding-current-students#Dept">https://publichealth.gwu.edu/content/funding-current-students#Dept</a></li> <li><a href="https://www.jhsph.edu/admissions/funding-opportunities">https://www.jhsph.edu/admissions/funding-opportunities</a></li> </ul>       |

| School Name                                                                                               | Internal Funding                                                                                                                                                                                                                                                                                      | Internal Funding resource website or handbook                                                                                                                                                                                                               |
|-----------------------------------------------------------------------------------------------------------|-------------------------------------------------------------------------------------------------------------------------------------------------------------------------------------------------------------------------------------------------------------------------------------------------------|-------------------------------------------------------------------------------------------------------------------------------------------------------------------------------------------------------------------------------------------------------------|
| 8. Georgia Southern University<br>Jiann-Ping Hsu College of<br>Public Health                              | School provides scholarships and Graduate Assistantship.                                                                                                                                                                                                                                              | <a href="https://jphcoph.georgiasouthern.edu/students/assistantships/">https://jphcoph.georgiasouthern.edu/students/assistantships/</a>                                                                                                                     |
| 9. Georgia State University<br>School of Public Health                                                    | Funding is not available for the DrPH program. School refers to Financial Aid Office.                                                                                                                                                                                                                 | <a href="https://sfs.gsu.edu/">https://sfs.gsu.edu/</a>                                                                                                                                                                                                     |
| 10. Harvard T.H. Chan School of<br>Public Health                                                          | <ul style="list-style-type: none"> <li>▪ An anonymous donor provided funding when the new DrPH program was launched.</li> <li>▪ There is no scholarship or fellowship specifically for DrPH students. Instead, school encourages students to explore all avenues of funding opportunities.</li> </ul> | <a href="https://www.hsph.harvard.edu/osfs/scholarship-information/">https://www.hsph.harvard.edu/osfs/scholarship-information/</a>                                                                                                                         |
| 11. Johns Hopkins Bloomberg<br>School of Public Health                                                    | The Bloomberg American Health Initiative provides full-tuition scholarships to 10 Bloomberg Doctoral (DrPH) Fellows each year.                                                                                                                                                                        | <a href="https://americanhealth.jhu.edu/fellowship/doctoral-program">https://americanhealth.jhu.edu/fellowship/doctoral-program</a>                                                                                                                         |
| 12. Loma Linda University School<br>of Public Health                                                      | School provides Selma Andrews travel funds and Selma Andrews scholarship funds to School of Public Health students.                                                                                                                                                                                   | <a href="https://home.llu.edu/sites/home.llu.edu/files/docs/student-handbook.pdf">https://home.llu.edu/sites/home.llu.edu/files/docs/student-handbook.pdf</a>                                                                                               |
| 13. New York Medical College<br>School of Health Sciences and<br>Practice & Institute of Public<br>Health | School provides special arrangement (e.g., scholarship), but there is no information available in public.                                                                                                                                                                                             | <a href="https://www.nymc.edu/current-students/student-services/bursar/tuition-and-fees/school-of-health-sciences-and-practice/">https://www.nymc.edu/current-students/student-services/bursar/tuition-and-fees/school-of-health-sciences-and-practice/</a> |
| 14. Pennsylvania State University<br>College of Medicine Public<br>Health Program                         | School provides Graduate Assistantships.                                                                                                                                                                                                                                                              | <a href="https://med.psu.edu/drph/tuition">https://med.psu.edu/drph/tuition</a>                                                                                                                                                                             |
| 15. SUNY Downstate Medical<br>Center School of Public Health                                              | School provides scholarship and fellowship.                                                                                                                                                                                                                                                           | <a href="https://sls.downstate.edu/financial_aid/">https://sls.downstate.edu/financial_aid/</a>                                                                                                                                                             |
| 16. Texas A&M School of Public<br>Health                                                                  | School offers scholarship and assistantship.                                                                                                                                                                                                                                                          | <a href="https://sph.tamhsc.edu/future/financial.html">https://sph.tamhsc.edu/future/financial.html</a>                                                                                                                                                     |

| School Name                                                                             | Internal Funding                                                                                                                                                                                                                                                                                                                                                                  | Internal Funding resource website or handbook                                                                                                                                                                                                                                                                                                                                                                                                                                                                    |
|-----------------------------------------------------------------------------------------|-----------------------------------------------------------------------------------------------------------------------------------------------------------------------------------------------------------------------------------------------------------------------------------------------------------------------------------------------------------------------------------|------------------------------------------------------------------------------------------------------------------------------------------------------------------------------------------------------------------------------------------------------------------------------------------------------------------------------------------------------------------------------------------------------------------------------------------------------------------------------------------------------------------|
| 17. Tulane University School of Public Health and Tropical Medicine                     | School offers fellowships and other student fundings.                                                                                                                                                                                                                                                                                                                             | <a href="https://catalog.tulane.edu/public-health-tropical-medicine/global-community-health-behavioral-sciences/global-community-health-science-behavior-dph/#text">https://catalog.tulane.edu/public-health-tropical-medicine/global-community-health-behavioral-sciences/global-community-health-science-behavior-dph/#text</a>                                                                                                                                                                                |
| 18. University at Albany School of Public Health                                        | School provides grants and scholarships to DrPH full-time students.                                                                                                                                                                                                                                                                                                               | <ul style="list-style-type: none"> <li>▪ <a href="https://www.albany.edu/sph/assets/2017-2018_Graduate_Handbook_FINAL.pdf">https://www.albany.edu/sph/assets/2017-2018_Graduate_Handbook_FINAL.pdf</a></li> <li>▪ <a href="https://www.albany.edu/graduatebulletin/public_health_drph_degree.htm">https://www.albany.edu/graduatebulletin/public_health_drph_degree.htm</a></li> </ul>                                                                                                                           |
| 19. University of Alabama at Birmingham School of Public Health                         | <ul style="list-style-type: none"> <li>▪ Biostatistics department provides fellowships, traineeships, and/or assistantship.</li> <li>▪ School provides scholarships.</li> </ul>                                                                                                                                                                                                   | <ul style="list-style-type: none"> <li>▪ <a href="https://www.soph.uab.edu/files/Student%20Handbooks/2018/BST_Graduate_Handbook_2018.pdf">https://www.soph.uab.edu/files/Student%20Handbooks/2018/BST_Graduate_Handbook_2018.pdf</a></li> <li>▪ <a href="https://uab.academicworks.com/">https://uab.academicworks.com/</a></li> </ul>                                                                                                                                                                           |
| 20. University of Arizona Mel and Enid Zuckerman College of Public Health               | School provides teaching and research assistantship and scholarships to graduate students.                                                                                                                                                                                                                                                                                        | <ul style="list-style-type: none"> <li>▪ School-wide: <a href="https://publichealth.arizona.edu/graduate-students/tuition-financial-assistance">https://publichealth.arizona.edu/graduate-students/tuition-financial-assistance</a></li> <li>▪ Maternal and Child Health Program: <a href="https://publichealth.arizona.edu/sites/publichealth.arizona.edu/files/MCH%202018-19%20Handbook.pdf">https://publichealth.arizona.edu/sites/publichealth.arizona.edu/files/MCH%202018-19%20Handbook.pdf</a></li> </ul> |
| 21. University of Arkansas for Medical Sciences Fay W. Boozman College of Public Health | School provides scholarships.                                                                                                                                                                                                                                                                                                                                                     | <a href="https://publichealth.uams.edu/students/current-students/student-resources/general-public-health-scholarships/">https://publichealth.uams.edu/students/current-students/student-resources/general-public-health-scholarships/</a>                                                                                                                                                                                                                                                                        |
| 22. University of California Berkeley School of Public Health                           | <ul style="list-style-type: none"> <li>▪ School offers grants (Graduate Student Researcher and Graduate Student Instructor) and graduate fellowships and scholarships.</li> <li>▪ DrPH candidates may also receive a one-time stipend from the Grossman Endowment.</li> <li>▪ DrPH candidates receive a 100% reduction in the annual nonresident tuition for a maximum</li> </ul> | <ul style="list-style-type: none"> <li>▪ <a href="https://sph.berkeley.edu/admissions/fees-financial-aid">https://sph.berkeley.edu/admissions/fees-financial-aid</a></li> <li>▪ <a href="http://sph.berkeley.edu/sites/default/files/2018_SPH_student-handbook_08-16-18.pdf">http://sph.berkeley.edu/sites/default/files/2018_SPH_student-handbook_08-16-18.pdf</a></li> </ul>                                                                                                                                   |

| School Name                                                                      | Internal Funding                                                                                              | Internal Funding resource website or handbook                                                                                                                                                                                                       |
|----------------------------------------------------------------------------------|---------------------------------------------------------------------------------------------------------------|-----------------------------------------------------------------------------------------------------------------------------------------------------------------------------------------------------------------------------------------------------|
|                                                                                  | of 3 calendar years (from the semester that they advanced), whether registered or not.                        |                                                                                                                                                                                                                                                     |
| 23. University of Georgia College of Public Health                               | School provides scholarship, awards, and graduate assistantships.                                             | <a href="https://publichealth.uga.edu/about/financial-aid/">https://publichealth.uga.edu/about/financial-aid/</a>                                                                                                                                   |
| 24. University of Illinois at Chicago School of Public Health                    | School offer scholarships, assistantships, and fellowships.                                                   | <a href="https://publichealth.uic.edu/admissions-aid/financial-aid">https://publichealth.uic.edu/admissions-aid/financial-aid</a>                                                                                                                   |
| 25. University of North Carolina Gillings School of Global Public Health         | School provides fellowship and scholarship.                                                                   | <a href="https://gradschool.unc.edu/funding/gradschool">https://gradschool.unc.edu/funding/gradschool</a>                                                                                                                                           |
| 26. University of Puerto Rico Graduate School of Public Health                   | School provides financial aid office information, but there is no clear information for DrPH students.        | <a href="http://www.rcm.upr.edu/wp-content/uploads/sites/3/2018/10/UPR-MS-CATALOG-2017-2020-REV-October-22-2018-SECURED.pdf">http://www.rcm.upr.edu/wp-content/uploads/sites/3/2018/10/UPR-MS-CATALOG-2017-2020-REV-October-22-2018-SECURED.pdf</a> |
| 27. University of South Florida College of Public Health                         | School provides Graduate Assistantships, Graduate Research Assistantships, and various types of scholarships. | <a href="http://health.usf.edu/publichealth/academicaffairs/FinAid">http://health.usf.edu/publichealth/academicaffairs/FinAid</a>                                                                                                                   |
| 28. University of Texas Health Science Center at Houston School of Public Health | School provides Graduate Research Assistantships, Teaching Assistantships, and various types of scholarships. | <a href="https://sph.uth.edu/prospective-students/prospective-student-faqs/">https://sph.uth.edu/prospective-students/prospective-student-faqs/</a>                                                                                                 |
